# Supplementary material for: Dynamic Profile of the Yak Mammary Transcriptome during the Lactation Cycle
Source: MDPI journal article supplement (doi:10.3390/ani13101710), 2023-05-22
Supplement: s1 [file s1]

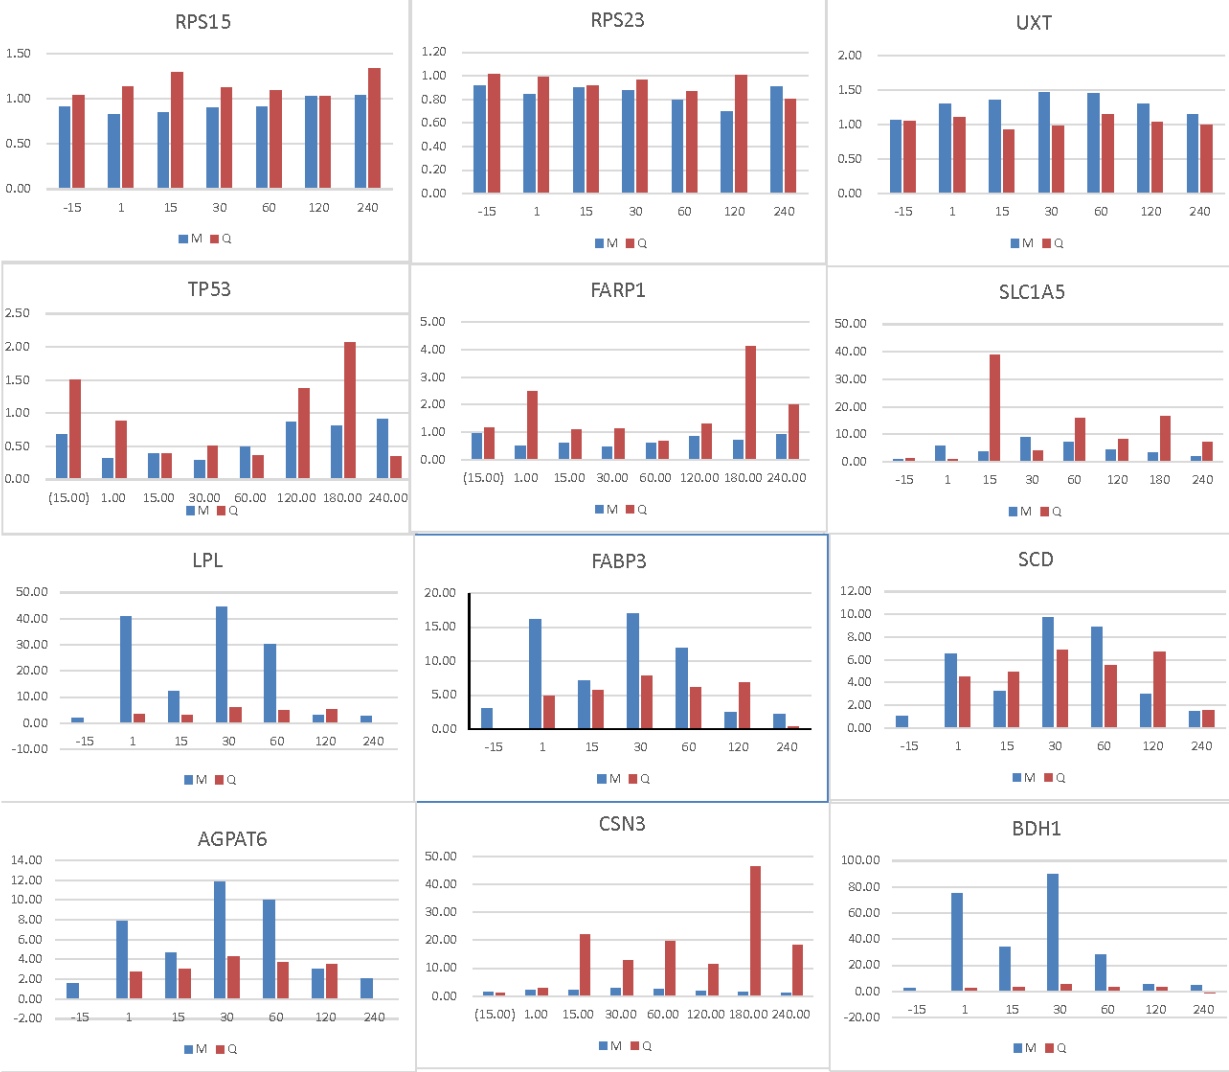

**Supplementary Figure S1.** Comparison of selected genes of Microarray (M: blue) and qPCR (Q: red) data in yak mammary gland during lactation.

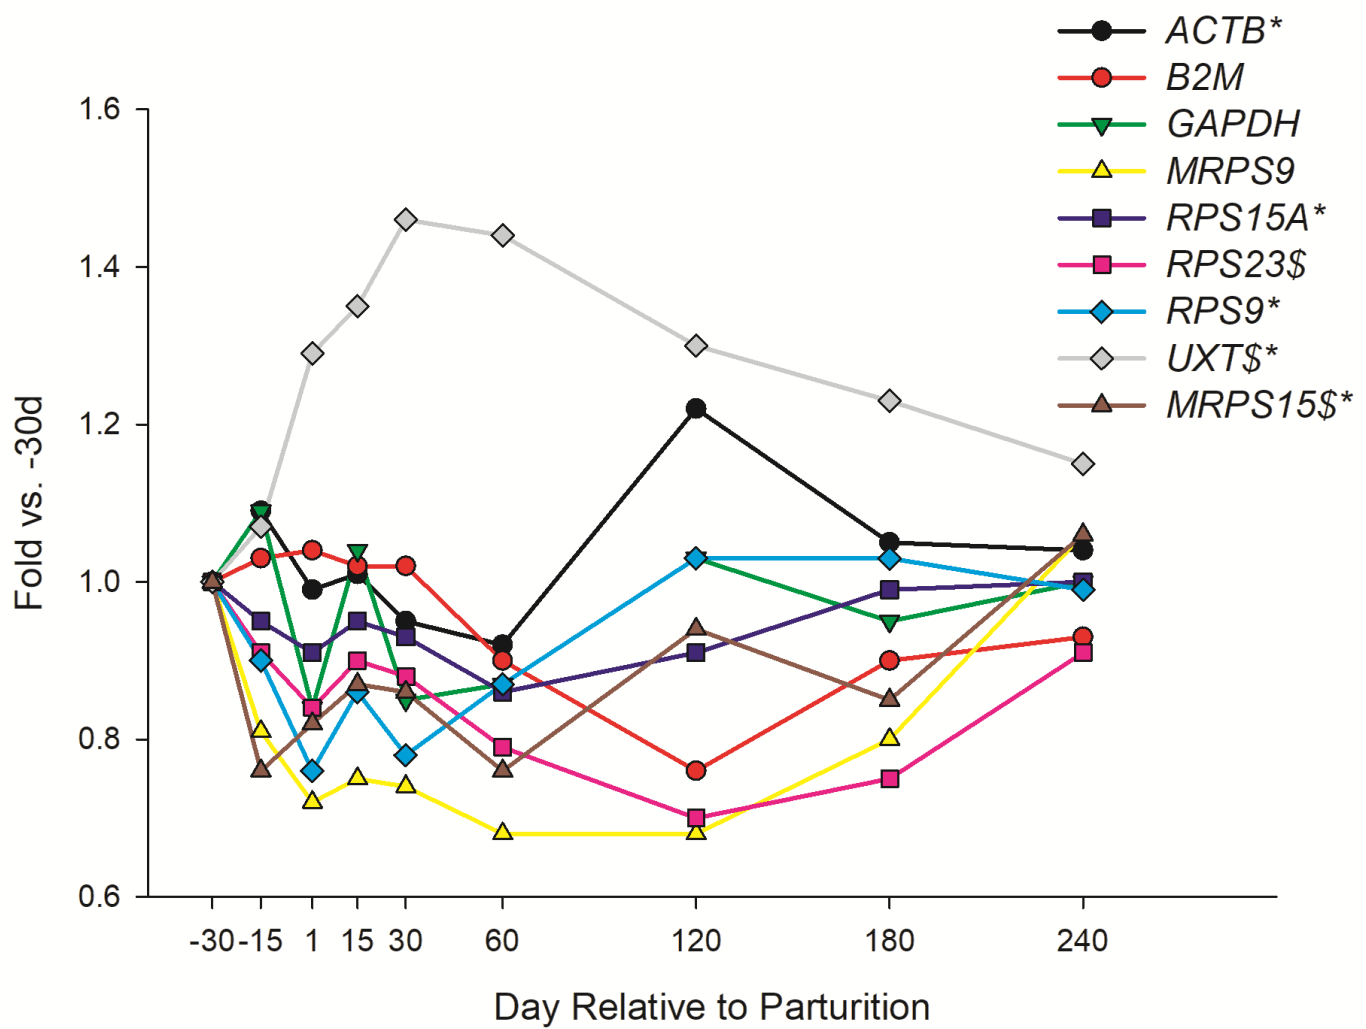

**Suppl. Figure 2.** Evaluation of the transcription pattern as detected by microarray on previously assessed potential internal control genes for RTqPCR. \$ indicate prior reference genes used to normalize RTqPCR data from the same samples used in the present manuscript (Jiang et al., 2016).\* indicate transcripts that were statistically affected with a  $FDR < 0.05$  by day relative to parturition in yak mammary tissue in the current experiment (see Suppl. File 1)
